# Supplementary material for: Circulating Extracellular Vesicle-Derived microRNAs as Novel Diagnostic and Prognostic Biomarkers for Non-Viral-Related Hepatocellular Carcinoma
Source: Preprints.org preprint supplement (doi:10.20944/preprints202308.1314.v1), 2023-08-18
Supplement: Supplementary file 1 [file supplementary]

## Supplementary Information

### **Circulating extracellular vesicle-derived microRNAs as novel diagnostic and prognostic biomarkers for non-viral-related hepatocellular carcinoma**

Bootsakorn Boonkaew<sup>1</sup>, Nantawat Satthawiwat<sup>1</sup>, Nutchapinjaroen<sup>2</sup>, Natthaya Chuaypen<sup>1\*</sup>, Pisit Tangkijvanich<sup>1\*</sup>

<sup>1</sup>Center of Excellence in Hepatitis and Liver Cancer, Department of Biochemistry, Faculty of Medicine, Chulalongkorn University, Bangkok, Thailand

<sup>2</sup>Department of Radiology, Faculty of Medicine, Chulalongkorn University, Bangkok, Thailand

\*Correspondence:

Pisit Tangkijvanich, M.D., Center of Excellence in Hepatitis and Liver Cancer, Faculty of medicine, Chulalongkorn University, Bangkok, 10330, Thailand.

Email: pisittkvn@yahoo.com; Tel: +66 2 256 4482

\*Co-correspondence:

Natthaya Chuaypen, PhD. Center of Excellence in Hepatitis and Liver Cancer, Faculty of medicine, Chulalongkorn University, Bangkok, 10330, Thailand.

Email: natthaya.c@chula.ac.th; natthaya.ch56@gmail.com; Tel: + 66 2 256 4482

Figure S1

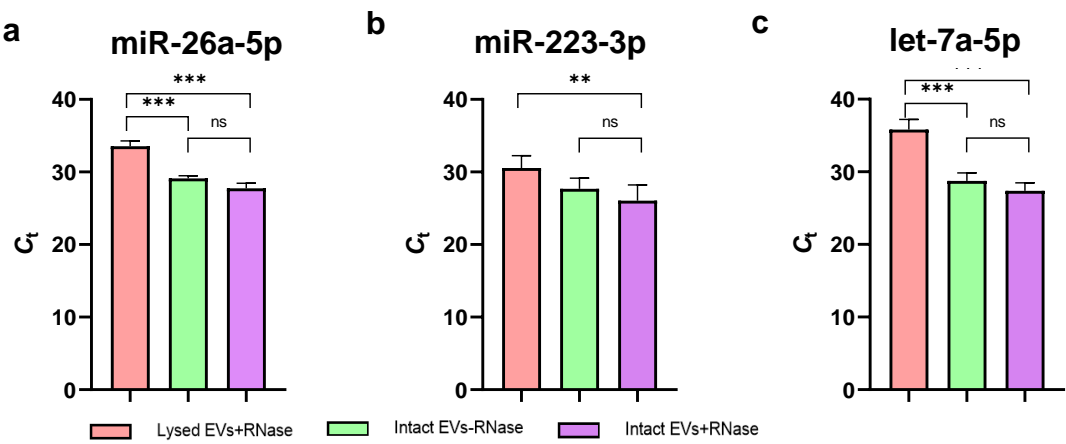

**Figure S1.** qRT-PCR analysis of EV miRNAs, (a) miR-26a-5p, (b) miR-223-3p, and (c) let-7a-5p upon RNase A treatment of lysed EVs and intact EVs with or without RNase A. Data are presented as means  $\pm$  S.E.M of 5 independent samples; ns = not significant, \*\* $P < 0.01$ , and \*\*\*  $P < 0.001$ .

Figure S2

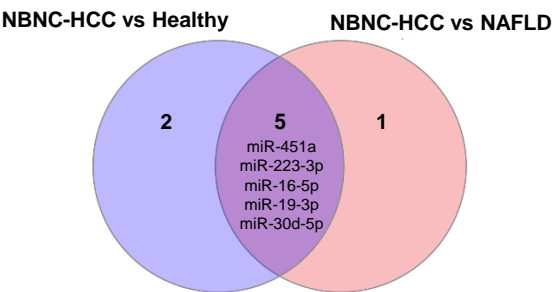

**Figure S2.** Venn diagram of intersect genes with fold change values more than 2.0 and showed a significant increase ( $P < 0.05$ ) when pairwise comparison between NBNC-HCC and NAFLD, and NBNC-HCC and healthy controls.

Figure S3

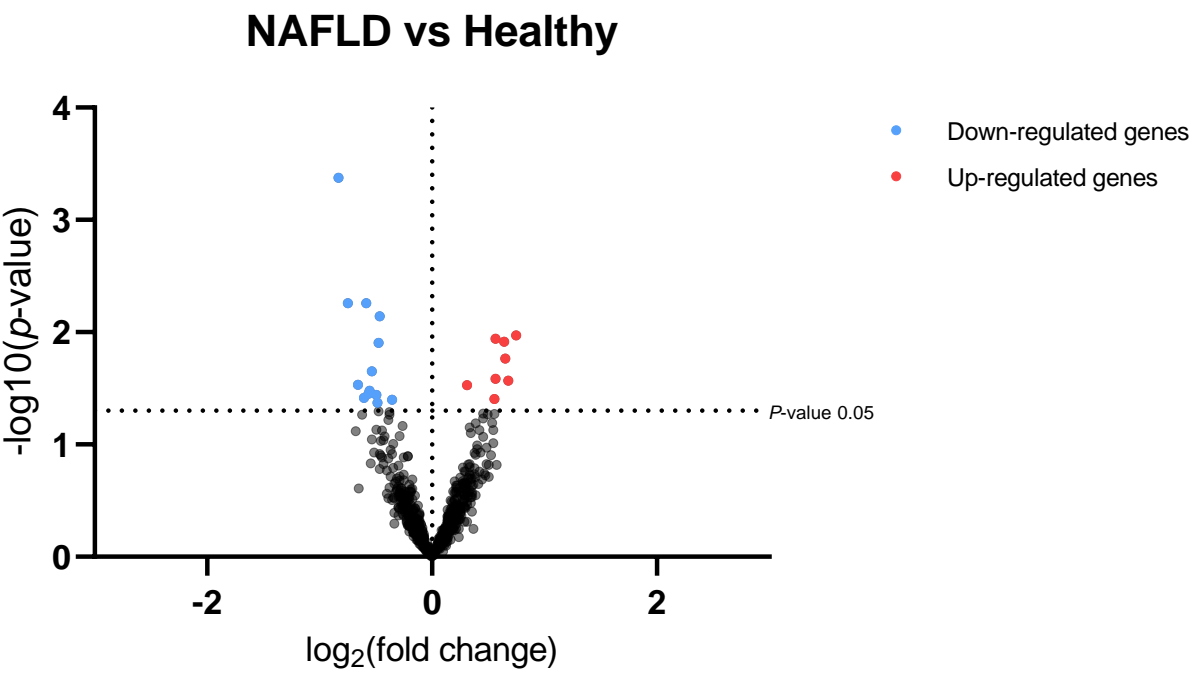

**Figure S3.** Volcano plot of all differentially expressed miRNAs in NAFLD samples compared with healthy control samples. The significantly up-regulated and down-regulated miRNAs are marked in red and blue dots, respectively.

Figure S4

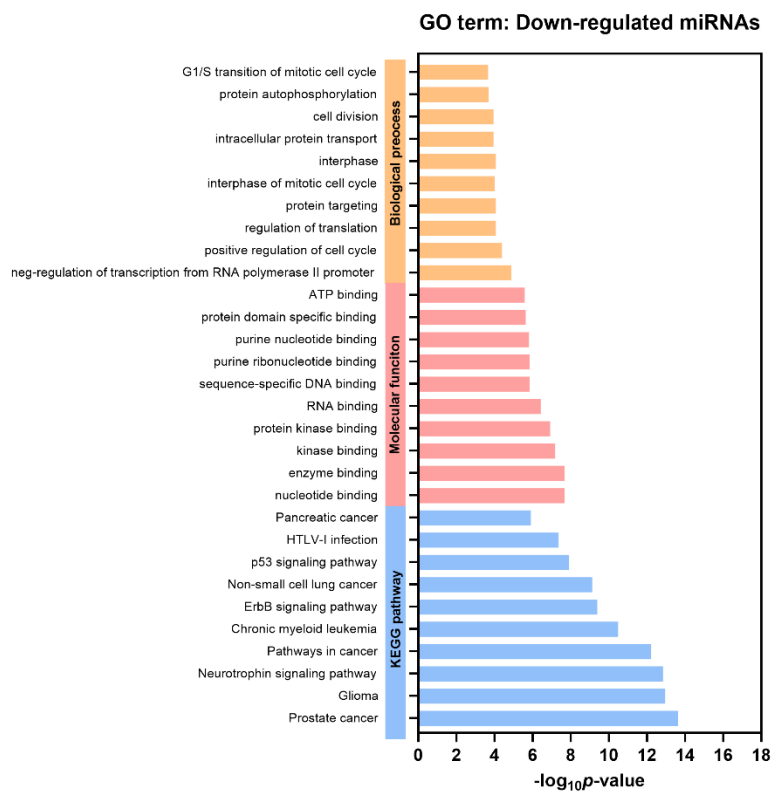

**Figure S4.** Gene Ontology (GO) analysis of the differentially downregulated EV miRNAs. Top 10 significantly enriched GO terms of biological process, molecular function, and KEGG pathways ( $P < 0.05$ ).

**Figure S5**

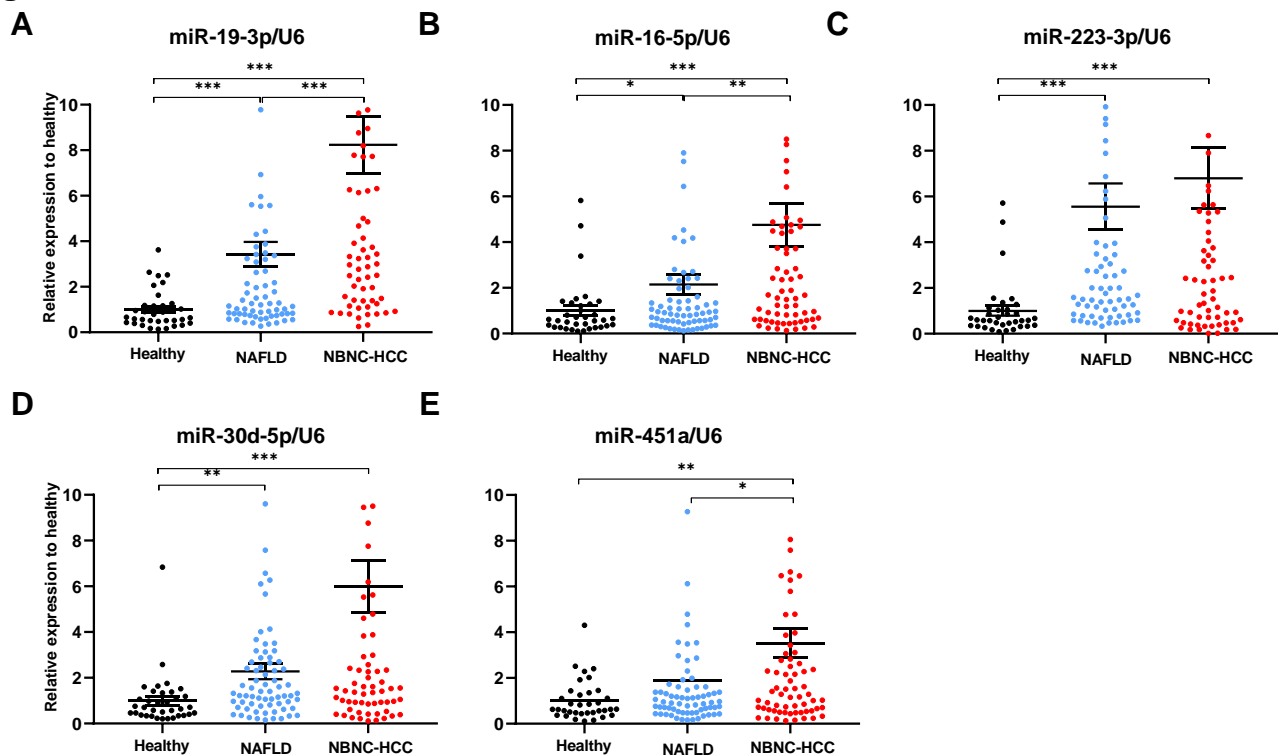

**Figure S5.** Validation of candidate miRNAs in plasma EV using qRT-PCR. The relative expressions of (a) miR-19-3p, (b) miR-16-5p, (c) miR-223-3p, (d) miR-30d-5p and (e) miR-451a in plasma EVs of healthy controls ( $n = 35$ ), patients with NAFLD ( $n = 70$ ), and patients with NBNC-HCC ( $n = 70$ ). Data are presented as mean  $\pm$  S.E.M., normalized with a reference gene, U6, and expressed relative to those of healthy controls. \*  $P < 0.05$ , \*\*  $P < 0.01$  and \*\*\*  $P < 0.001$ .

Figure S6

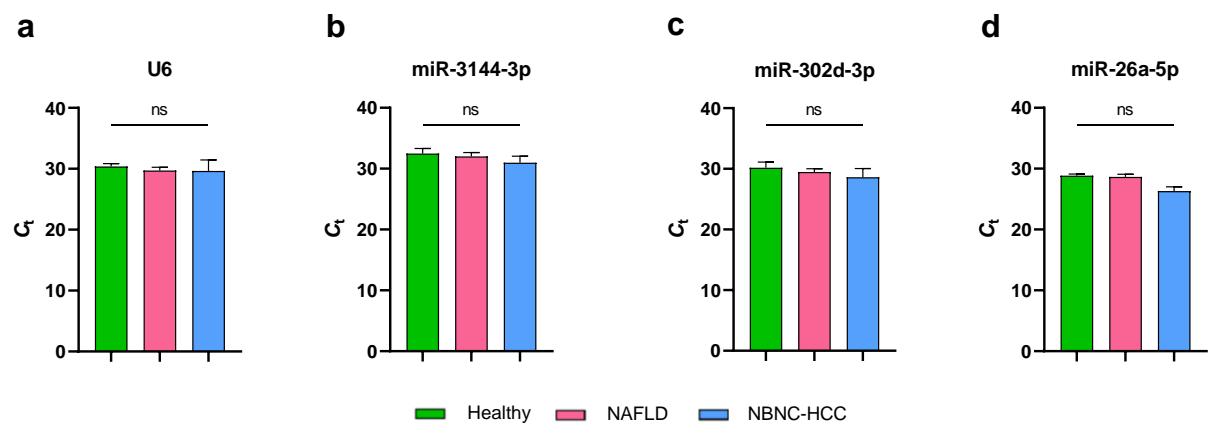

**Figure S6.** qRT-PCR analysis of candidate internal controls in the study cohort from plasma EVs of healthy controls (n = 10), NAFLD (n = 10), and NBNC-HCC (n = 9). Data are presented as means  $\pm$  S.D.; ns = not significant.

**Table S1.** Sequences of primers used for qRT-PCR analysis

| Sequence          | Sequence 5'-3'              | Tm (°C) |
|-------------------|-----------------------------|---------|
| miR-451a          | AAACCGTTACCATTACTGAGTT      | 52      |
| miR-223-3p        | TGTCAGTTTGTCAAATACCCCA      | 55      |
| miR-19-3p         | TGTGCAAATCCATGCAAAACTGA     | 57      |
| miR-16-5p         | TAGCAGCACGTAAATATTGGCG      | 57      |
| miR-30d-5p        | TGTAAACATCCCCGACTGGAAG      | 58      |
| miR-216b-5p       | AAATCTCTGCAGGCAAATGTGA      | 56      |
| miR-765           | TGGAGGAGAAGGAAGGTGATG       | 57      |
| miR-105-5p        | TCAAATGCTCAGACTCCTGTGGT     | 60      |
| miR-608           | AGGGGTGGTGTGTTGGGACAGCTCCGT | 71      |
| U6                | CTCGCTTCGGCAGCACA           | 58      |
| miR-3144-3p       | ATATACCTGTTCGGTCTCTTTA      | 51      |
| miR-302d-3p       | TAAGTGCTTCCATGTTTGAGTGT     | 55      |
| miR-26a-5p        | TTCAAGTAATCCAGGATAGGCT      | 54      |
| miR-26a-5p        | TTCAAGTAATCCAGGATAGGCT      | 54      |
| let-7a-5p         | UGAGGUAGUAGGUUGUAUAGUU      | 51      |
| Universal reverse | GCAGGGTCCGAGGTATTCTG        | 60      |
